# Supplementary material
Source: ML conference proceedings conference paper supplement (https://openaccess.thecvf.com/content/ICCV_2017/html/Tonioni_Unsupervised_Adaptation_for_ICCV_2017_paper.html)
Supplement: Supplementary file 1 [file Tonioni_Unsupervised_Adaptation_for_ICCV_2017_supplemental.pdf]

(listing pending)
