# Supplementary material
Source: ML conference proceedings conference paper supplement (https://openaccess.thecvf.com/content/ICCV_2017/html/Tonioni_Unsupervised_Adaptation_for_ICCV_2017_paper.html)
Supplement: Supplementary file 2 [file Tonioni_Unsupervised_Adaptation_for_ICCV_2017_supplemental.pdf]

Archive with 6 entries (6 files):
- 0893-supp.pdf
- FlyingSnow.avi
- RainBlur.avi
- RainFlares.avi
- ReflectingCars.avi
- WetAutobahn.avi
