# Supplementary material
Source: ML conference proceedings conference paper supplement (https://openaccess.thecvf.com/content/ICCV_2017/html/Tonioni_Unsupervised_Adaptation_for_ICCV_2017_paper.html)
Supplement: Supplementary file 2 [file Tonioni_Unsupervised_Adaptation_for_ICCV_2017_supplemental.pdf › 0893-supp.pdf]

# Unsupervised Adaptation for Deep Stereo - Supplementary Material

Alessio Tonioni, Matteo Poggi, Stefano Mattoccia, Luigi Di Stefano  
University of Bologna,  
Department of Computer Science and Engineering (DISI)  
Viale del Risorgimento 2, Bologna

{alessio.tonioni, matteo.poggi8, stefano.mattoccia, luigi.distefano}@unibo.it

In this document, we report additional results and details concerning paper #893, "Unsupervised Adaptation for Deep Stereo". [section 1](#) shows qualitative results on challenging stereo pairs from sequences belonging to the dataset proposed in [\[4\]](#), while [section 2](#) reports details concerning implementation and off-the-shelf tools (i.e., trained Dispnet and CCNN architectures) deployed in our work. Within the supplementary material we also enclose videos showing the complete results on the sequences considered in [section 1](#).

## 1 Additional Qualitative Results

This section contains additional qualitative results on frames taken from the dataset proposed in [\[4\]](#). We focus on these sequences because of the very challenging conditions they address. In particular, the poor illumination common to all these frames represents one of the hardest nuisance to any stereo algorithm. Moreover, as there exists no ground-truth data available for this dataset, it represents a perfect scenario to validate our unsupervised adaptation technique.

[Table 1](#) and [Table 2](#) show on the first row the original left stereo frame, on the second an equalized version of the frame (to provide the reader with a better perception of the depicted scene, often hard to obtain due to poor lighting), on the third the disparity map computed by the original Dispnet [\[3\]](#) trained on synthetic data only, on the fourth the prediction obtained using Dispnet fine tuned supervisedly on the KITTI 2012 training dataset [\[1\]](#), and, finally, on the fifth, the disparity map inferred by Disp-

net after our unsupervised adaptation method using AD-CENSUS [\[6\]](#) as stereo algorithm and CCNN [\[5\]](#) as confidence estimator.

By analyzing the results in [Table 1](#), we can observe that in this challenging environment the original Dispnet trained only on synthetic data fails to produce meaningful disparity maps, thereby confirming the need for further training when deploying this network in real environments and challenging conditions. Fine tuning on a similar real scenario with available ground truth (Dispnet K12-GT) helps improving the performance, but the predicted disparity map remains noisy and with large mistakes. An example is given by the #0 frame from RainBlur sequence (leftmost column of [Table 1](#)), where Dispnet K12-GT fails on a large portion on the left side of the image, while our unsupervised adaptation methodology (ADAPTED DispNet) can predict much more correctly the depth structure of the scene. Moving to the second column, depicting the results concerning the WetAutobahn sequence (in particular, frame #5), Dispnet hardly identifies the car on the left part of the image and it almost does not notice the presence of the large truck in the middle of the scene, which is more evident in the disparity map depicted by ADAPTED Dispnet, which also provides better detection of the car on the left. Moreover, the entire street appears to be smoother. As for the third column, depicting frame #11 from sequence RainFlares, Dispnet K12-GT presents a blurred depth estimation on the rightmost part of the image, this issue not affecting the prediction obtained by ADAPTED DispNet.

[Table 2](#) reports additional qualitative results from sequences FlyingSnow, RainFlares and ReflectingCars,

|                 |                                                                                     |                                                                                      |                                                                                       |
|-----------------|-------------------------------------------------------------------------------------|--------------------------------------------------------------------------------------|---------------------------------------------------------------------------------------|
| Left            | 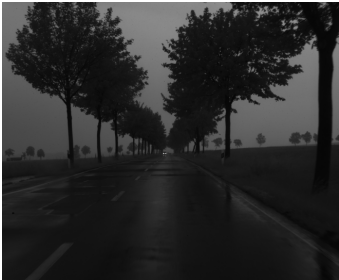   | 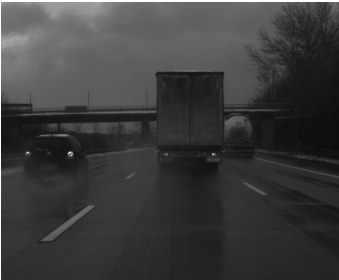   | 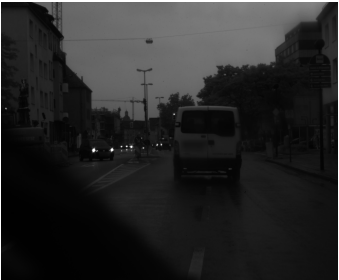   |
| Left equalized  | 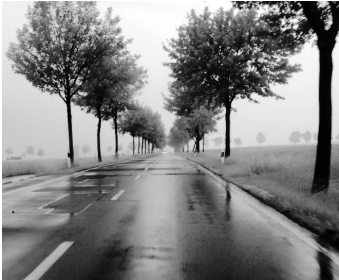   | 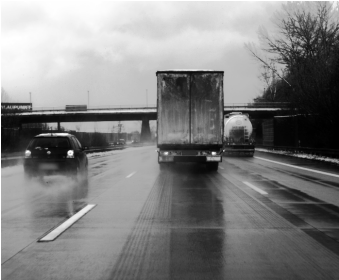   | 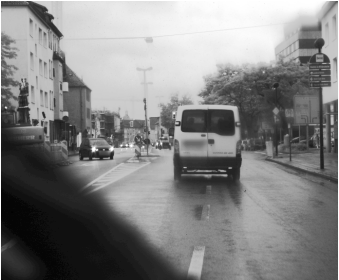   |
| Dispnet         | 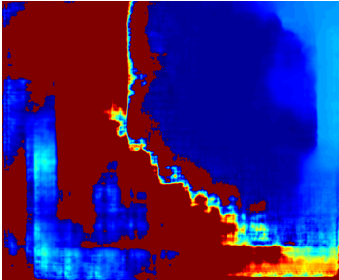  | 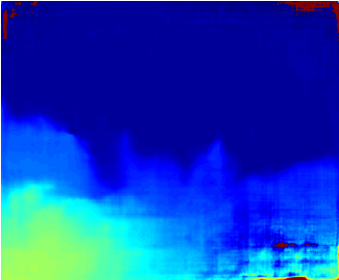  | 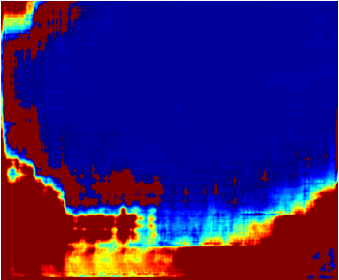  |
| Dispnet K12-GT  | 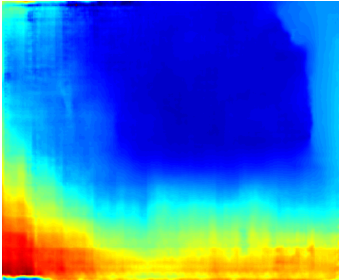 | 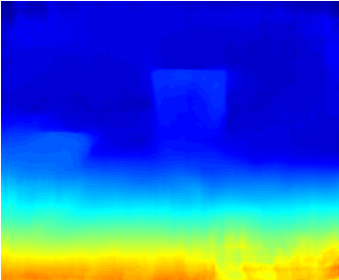 | 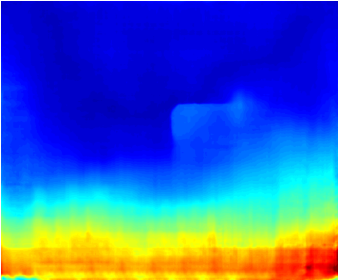 |
| Dispnet ADAPTED | 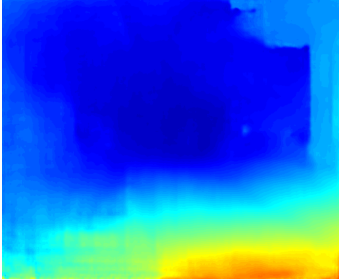 | 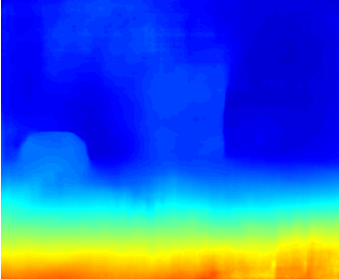 | 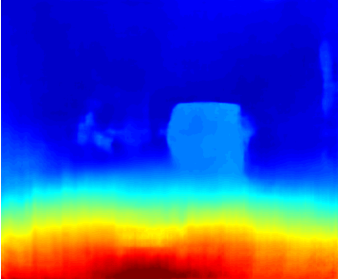 |

Table 1: From left to right qualitative result on: RainBlur (#0), WetAutobahn (#5), RainFlares (#11).

|                 |                                                                                     |                                                                                      |                                                                                       |
|-----------------|-------------------------------------------------------------------------------------|--------------------------------------------------------------------------------------|---------------------------------------------------------------------------------------|
| Left            | 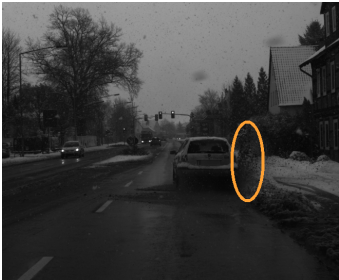   | 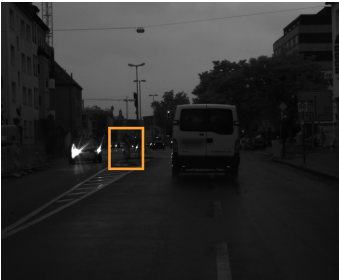   | 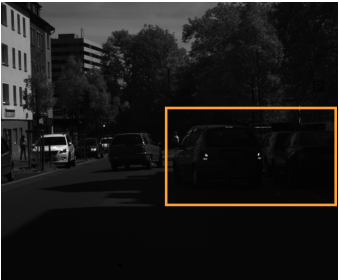   |
| Left equalized  | 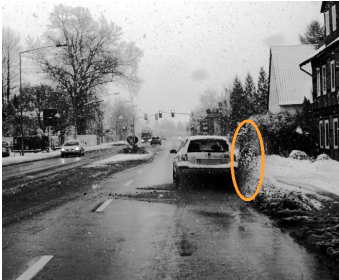   | 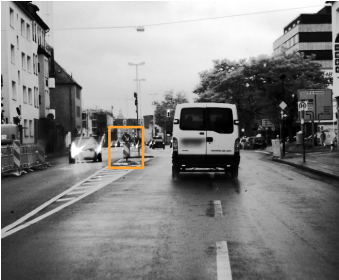   | 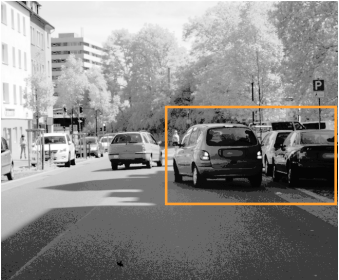   |
| Dispnet         | 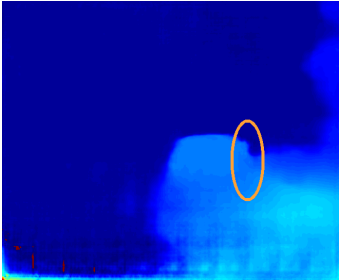  | 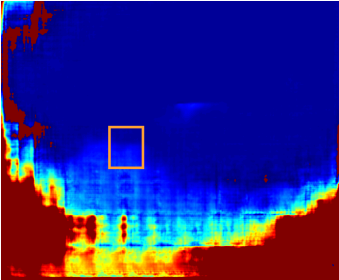  | 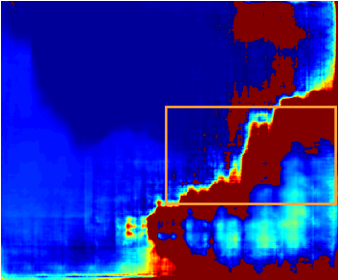  |
| Dispnet K12-GT  | 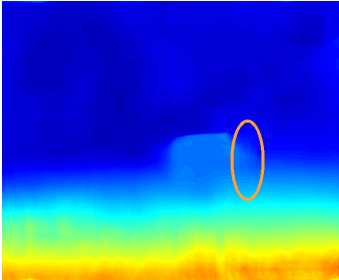 | 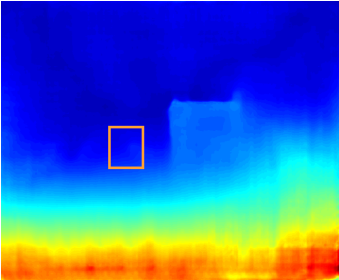 | 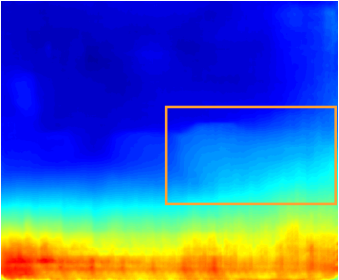 |
| Dispnet ADAPTED | 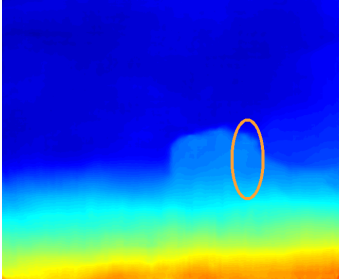 | 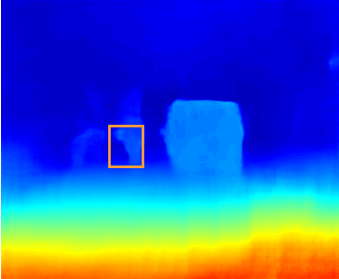 | 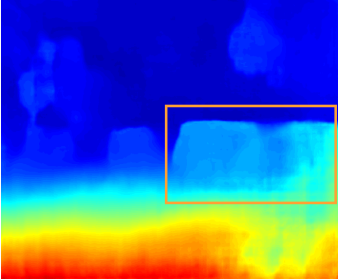 |

Table 2: From left to right qualitative results on Flying Snow (#4), Rain Flares (#23), Reflecting Cars (#18).

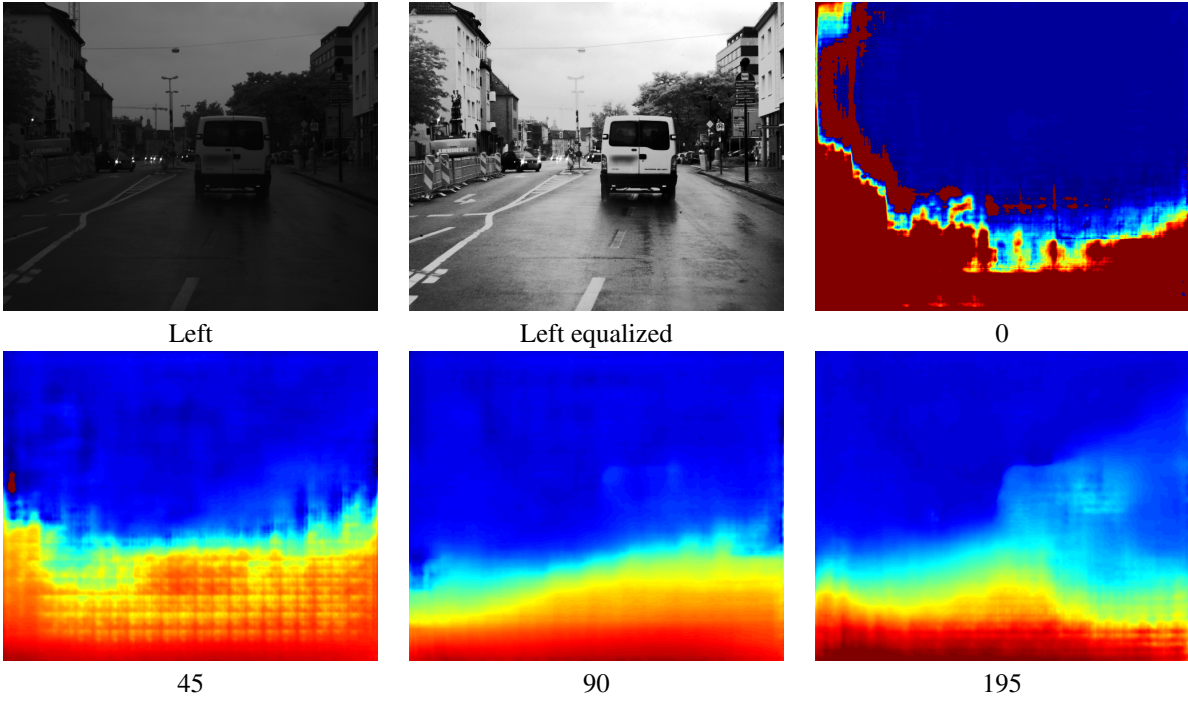

Table 3: Qualitative results of our adaptation method at different iterations on the Rain Flares sequence.

from left to right, respectively. Similarly to Table 1, we show here the left frame, the equalized left frame and the disparity maps yielded by Dispnet, Dispnet K12-GT and ADAPTED Dispnet, from top to bottom, respectively. On each sequence, we focus on particular elements captured by the scene, to highlight the benefits brought in by our unsupervised adaptation approach. Thus, in the leftmost column, we circle on frame #4 from FlyingSnow a wave of snow raised by the car (more easily visible in the equalized left image), which is better sensed by ADAPTED Dispnet. In frame #23 from RainFlares, ADAPTED Dispnet correctly reconstructs the traffic sign circled in the reference image, which is totally absent in the disparity map computed by Dispnet K12-GT, which also present a large error on the bottom-right corner of the image. Finally, in the rightmost column, the ReflectingCars sequence deals with a very challenging scene (hardly intelligible from the original left frame before equalization). Here, Dispnet K12-GT senses one blurred object in correspondence of the two cars highlighted by the box in the original and equalized images, whilst ADAPTED Dispnet allows for a clearer detection of the two objects.

## 2 Implementation Details

We provide some more insights on the software used for our method and on the timing performance achieved by our adaptation techniques. For all our tests we rely on the original code and weights made available by the authors for both Dispnet[3]<sup>1</sup> and CCNN [5]<sup>2</sup>. For CCNN we do not modify the original implementation nor we re-trained the network in any manner, instead we just used the provided test script and weights to compute a confidence map for the disparities obtained using AD-CENSUS[6] and SGM[2] on our train and tests datasets. Conversely to achieve our adapted DispNet we modify the original Caffe implementation to minimize our novel loss function. In particular, for all our training we perform fine-tuning of the Dispnet-Corr1D model based on our loss function starting from the weights of the network trained

on synthetic data provided by the authors. We will make the code to perform fine-tuning based on our loss available to the scientific community.

As for the timing performance, our method does not slow down in any way the original Dispnet either in training or testing. Running on a Titan X Pascal GPU, our model requires for images at KITTI resolution respectively 0.06s per image at inference time and 0.6s per 4 image batch at training time (assuming already available depth and confidence map). As for CCNN, computing a confidence map requires approximately 0.3s on a GPU (i.e., Titan X) for the same KITTI resolution; AD-CENSUS and SGM instead requires negligible time as they can leverage on highly optimized (even hardware based) implementation. As can be observed in Table 3, our method allows for a quick adaptation of the network to the new environment. After just 90 iterations the disparity predicted on the road starts to be meaningful and at around 200 iteration the network starts to identify the van in front of the vehicle. More generally, our tests show that usually within the first 200/300 iterations ( $\sim 2$ -3 minutes) our adaptation can solve the biggest mistakes in the disparity map initially predicted, while the subsequent steps improve the overall definition and performs minor adjustments. From this observation we think that, alternating training and inference steps and with a careful tuning of the hyper-parameters, it might be possible in the future to use our method to create the first self adapting deep stereo system.

## References

- [1] A. Geiger, P. Lenz, and R. Urtasun. Are we ready for autonomous driving? the kitti vision benchmark suite. In *Conference on Computer Vision and Pattern Recognition (CVPR)*, 2012. 1
- [2] H. Hirschmuller. Stereo processing by semiglobal matching and mutual information. *IEEE Transactions on Pattern Analysis and Machine Intelligence (PAMI)*, 30(2):328–341, feb 2008. 5
- [3] N. Mayer, E. Ilg, P. Häusser, P. Fischer, D. Cremers, A. Dosovitskiy, and T. Brox. A large dataset to train convolutional networks for disparity, optical flow, and scene flow estimation. In *The IEEE Conference on Computer Vision and Pattern Recognition (CVPR)*, 2016. 1, 5

<sup>1</sup><http://lmb.informatik.uni-freiburg.de/resources/binaries/displownet/displownet-release-1.1.tar.gz>

<sup>2</sup>[http://vision.disi.unibo.it/~mpoggi/code/BMVC2016\\_train\\_and\\_test.zip](http://vision.disi.unibo.it/~mpoggi/code/BMVC2016_train_and_test.zip)

- [4] S. Meister, B. Jähne, and D. Kondermann. Outdoor stereo camera system for the generation of real-world benchmark data sets. *Optical Engineering*, 51(02):021107, 2012. 1
- [5] M. Poggi and S. Mattoccia. Learning from scratch a confidence measure. In *Proceedings of the 27th British Conference on Machine Vision, BMVC*, 2016. 1, 5
- [6] R. Zabih and J. Woodfill. Non-parametric local transforms for computing visual correspondence. In *Proceedings of the Third European Conference on Computer Vision (Vol. II)*, ECCV '94, pages 151–158, Secaucus, NJ, USA, 1994. Springer-Verlag New York, Inc. 1, 5
